# Supplementary material for: Synoptic patterns associated with high-frequency sea level extremes in the Adriatic Sea
Source: Copernicus journal article supplement (doi:10.5194/egusphere-2024-3711), 2024-12-04
Supplement: Supplementary file 1 [file egusphere-2024-3711-supplement.pdf]

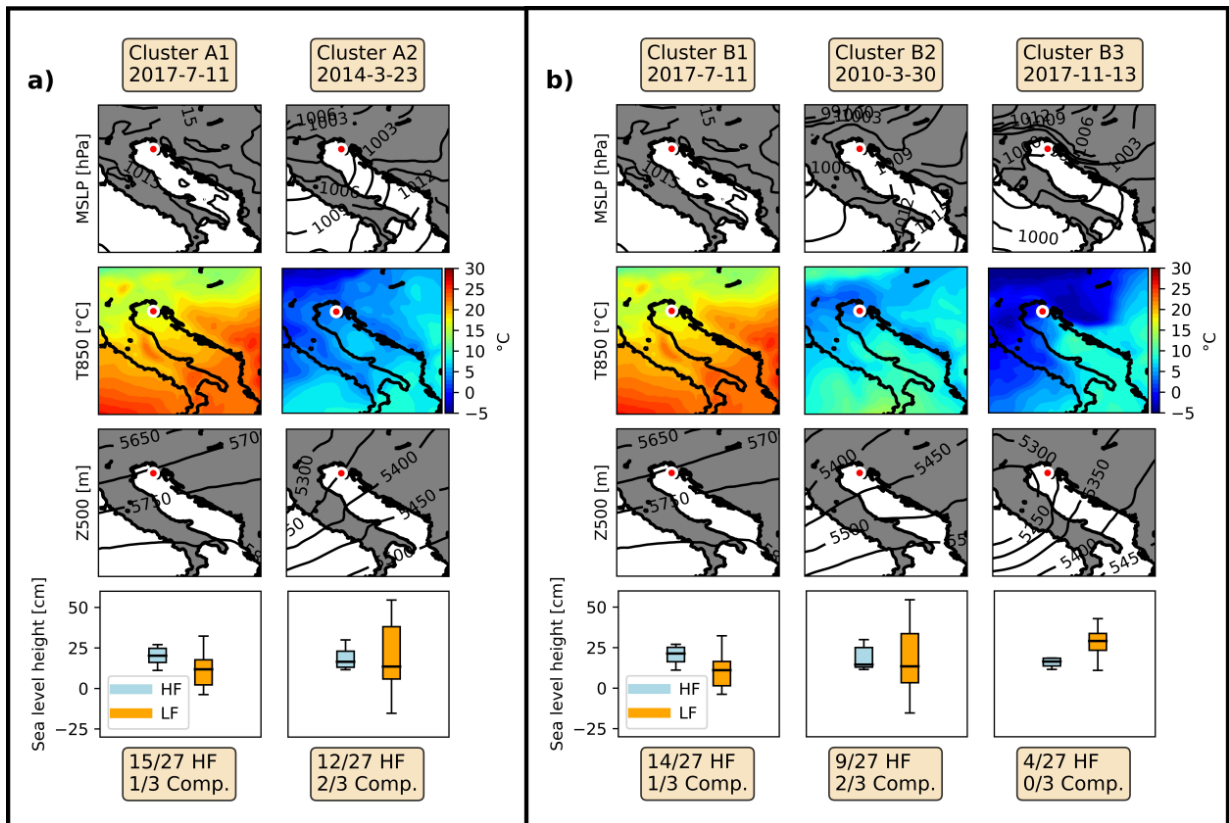

**Figure 1S:** Medoids for a choice of a) two and b) three clusters for Rovinj. The first three rows show: MSLP, temperature at 850 hPa (T850), and geopotential height at 500 hPa (Z500). Forth row shows box-plots of HF (blue box) and LF (orange box) sea level heights during HF and Compound extremes. The dates of medoids are given at the top of each column and the location of Rovinj tide gauge is marked with a circle. Additionally, at the bottom of each column the numbers of HF and Compound extremes grouped in each cluster are given.

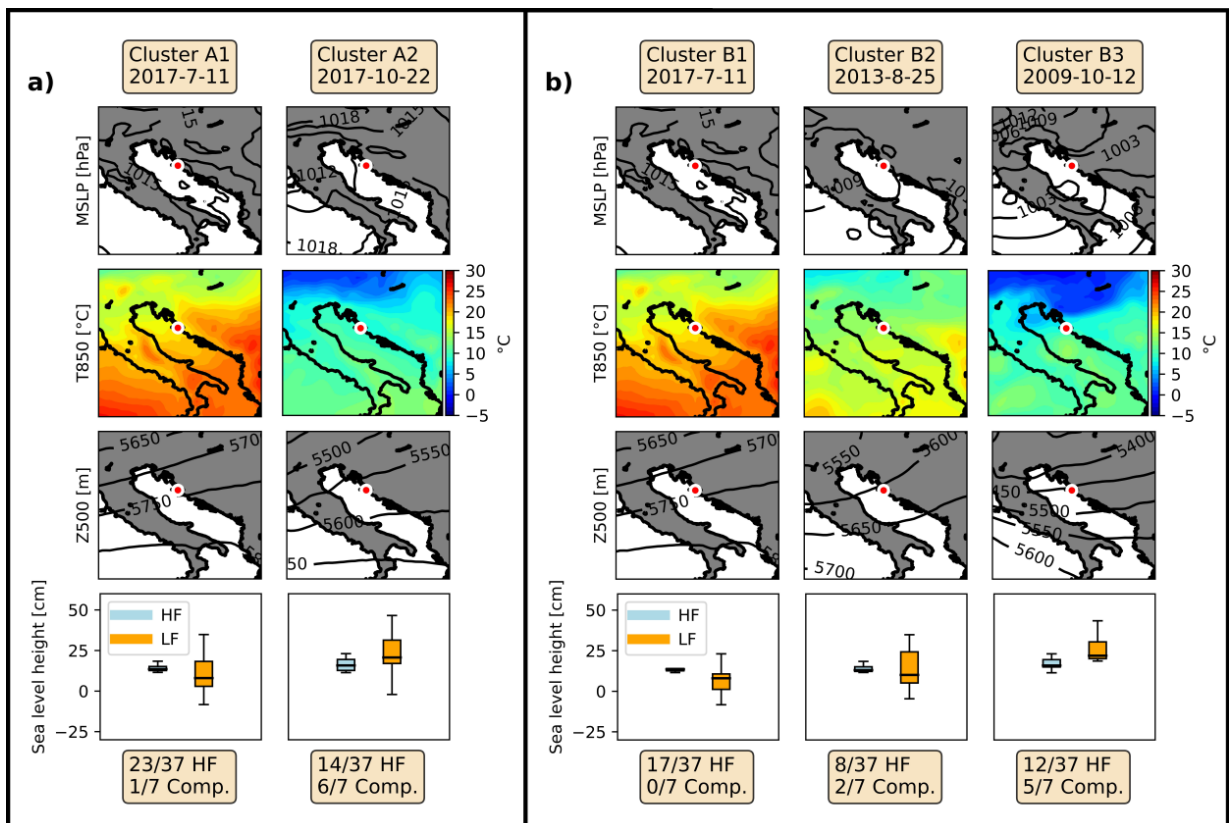

**Figure 2S:** Medoids for a choice of a) two and b) three clusters for Zadar. The first three rows show: MSLP, temperature at 850 hPa (T850), and geopotential height at 500 hPa (Z500). Forth row shows box-plots of HF (blue box) and LF (orange box) sea level heights during HF and Compound extremes. The dates of medoids are given at the top of each column and the location of Zadar tide gauge is marked with a circle. Additionally, at the bottom of each column the numbers of HF and Compound extremes grouped in each cluster are given.

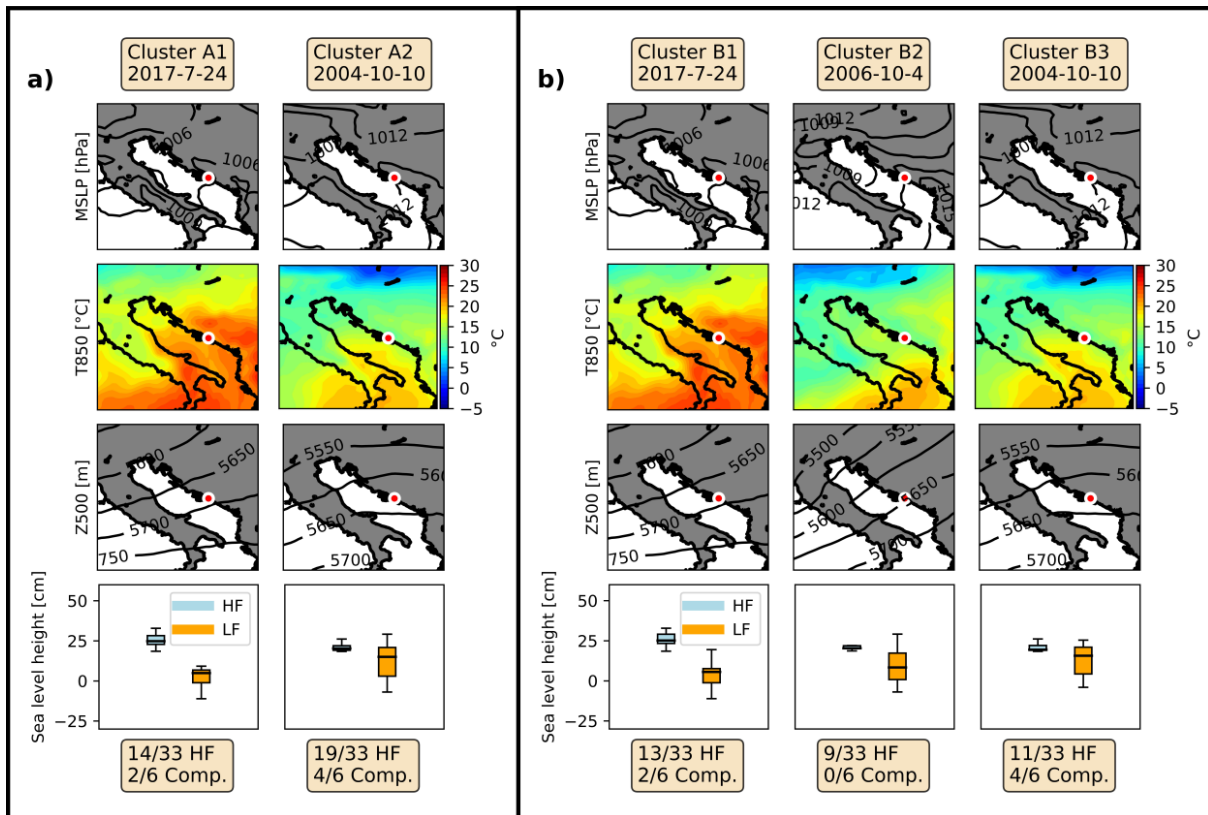

**Figure 3S:** Medoids for a choice of a) two and b) three clusters for Ploče. The first three rows show: MSLP, temperature at 850 hPa (T850), and geopotential height at 500 hPa (Z500). Forth row shows box-plots of HF (blue box) and LF (orange box) sea level heights during HF and Compound extremes. The dates of medoids are given at the top of each column and the location of Ploče tide gauge is marked with a circle. Additionally, at the bottom of each column the numbers of HF and Compound extremes grouped in each cluster are given.
